# Supplementary material
Source: Springer Nature journal article supplement (https://www.springermedizin.de/resource/supplementary/12936_2005_191_MOESM4_ESM.pdf/9547140)

A. Dry season

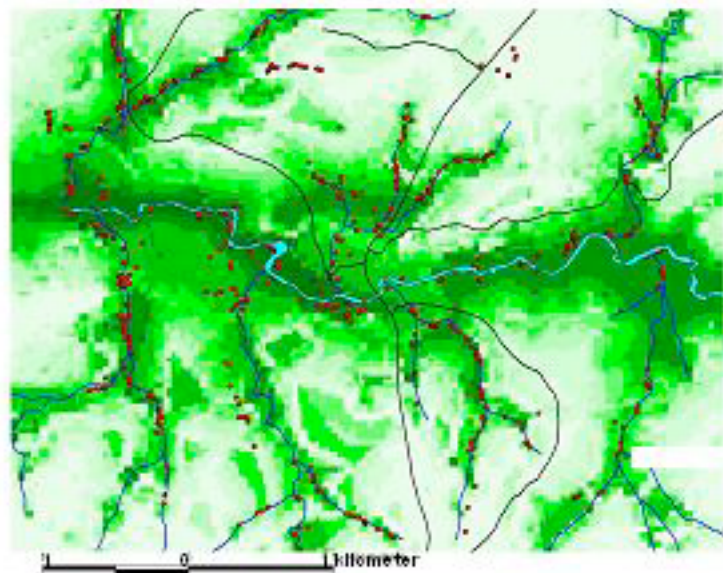

B. Rainy season

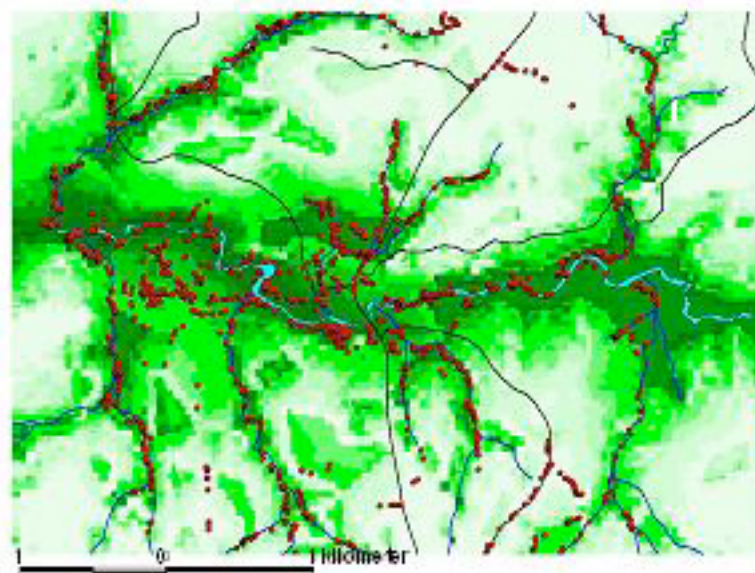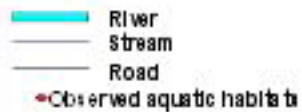

Predicted aquatic habitats

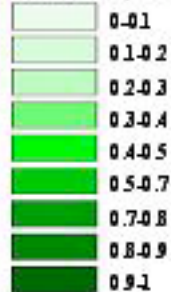

Supplement: MOESM4 [file 9547140]
